# Supplementary material for: Microscopic modelling of nematic elastic constants beyond Straley theory
Source: Royal Society of Chemistry journal article supplement (doi:10.1039/d1sm01502h), 2021-12-15
Supplement: d1sm01502h1.pdf [file d1sm01502h1.pdf]

# ELECTRONIC SUPPLEMENTARY INFORMATION

## Microscopic modelling of nematic elastic constants beyond Straley theory

Davide Revignas and Alberta Ferrarini\*

Università di Padova

Dipartimento di Scienze Chimiche, via Marzolo 1, 35131 Padova, Italy

\*alberta.ferrarini@unipd.it

### Table of Contents

|          |                                                                                    |          |
|----------|------------------------------------------------------------------------------------|----------|
| <b>1</b> | <b>Deformations and model particles</b>                                            | <b>2</b> |
| <b>2</b> | <b>Ideal and excess contributions to Frank elastic constants and plots of ODFs</b> | <b>3</b> |
| 2.1      | Rod . . . . .                                                                      | 3        |
| 2.2      | Bent Rod . . . . .                                                                 | 5        |

# 1 Deformations and model particles

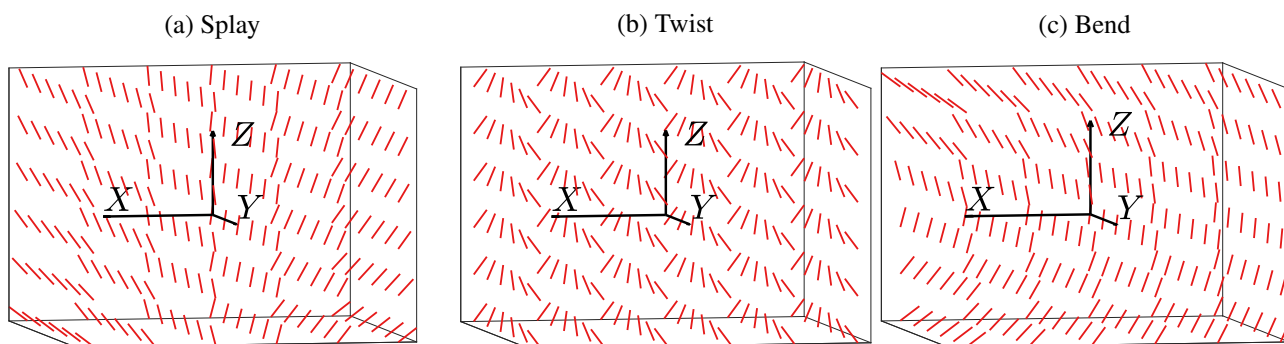

Figure S 1: Sketch of the director field (red) in presence of the three deformations defined in Eqs. (11-12) of the main text.  $(OXYZ)$  is the laboratory reference frame.

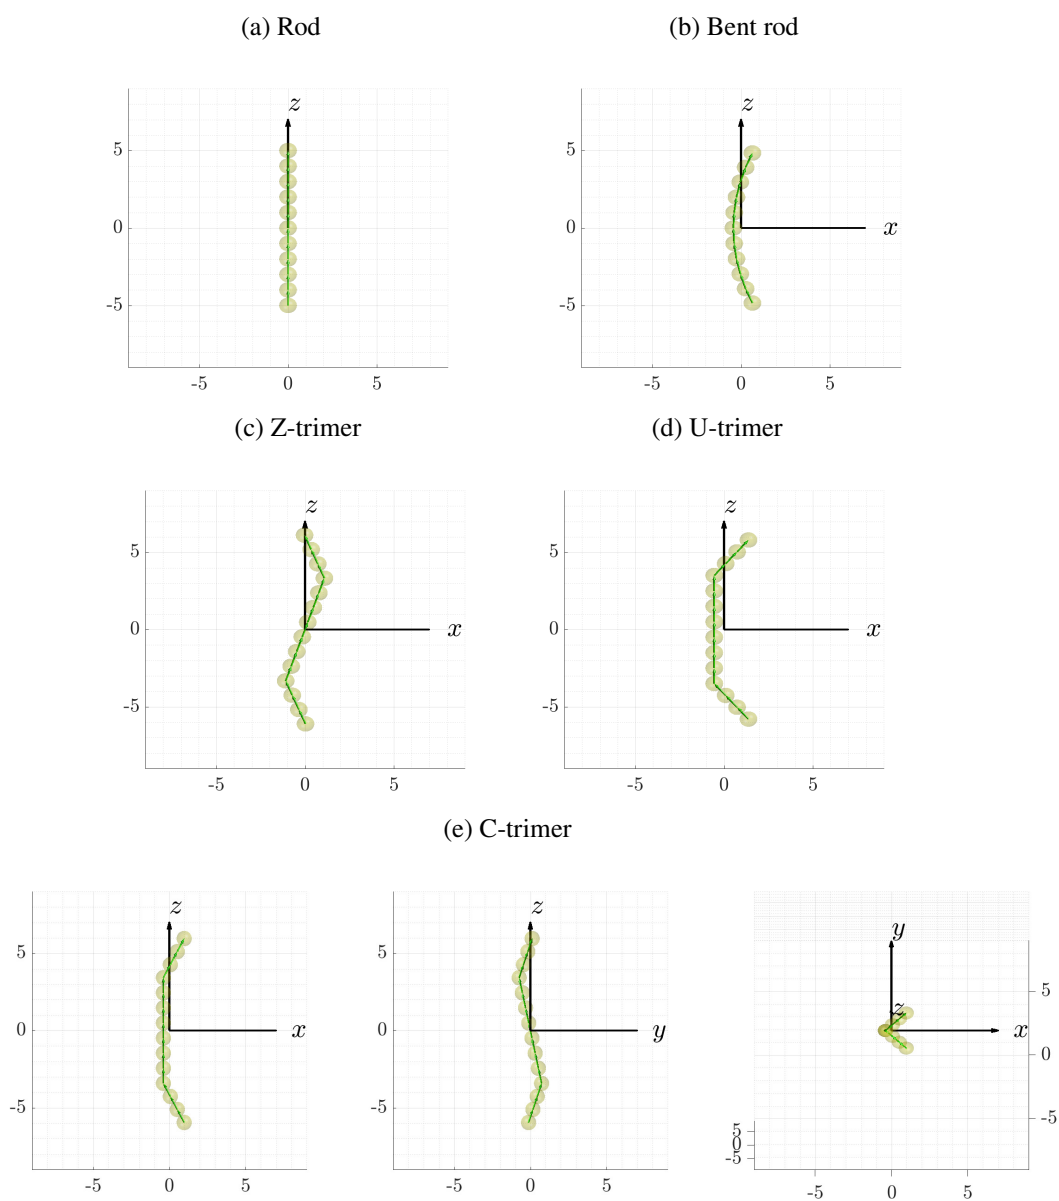

Figure S 2: Sketches of the particles studied in the present work.

## 2 Ideal and excess contributions to Frank elastic constants and plots of ODFs

### 2.1 Rod

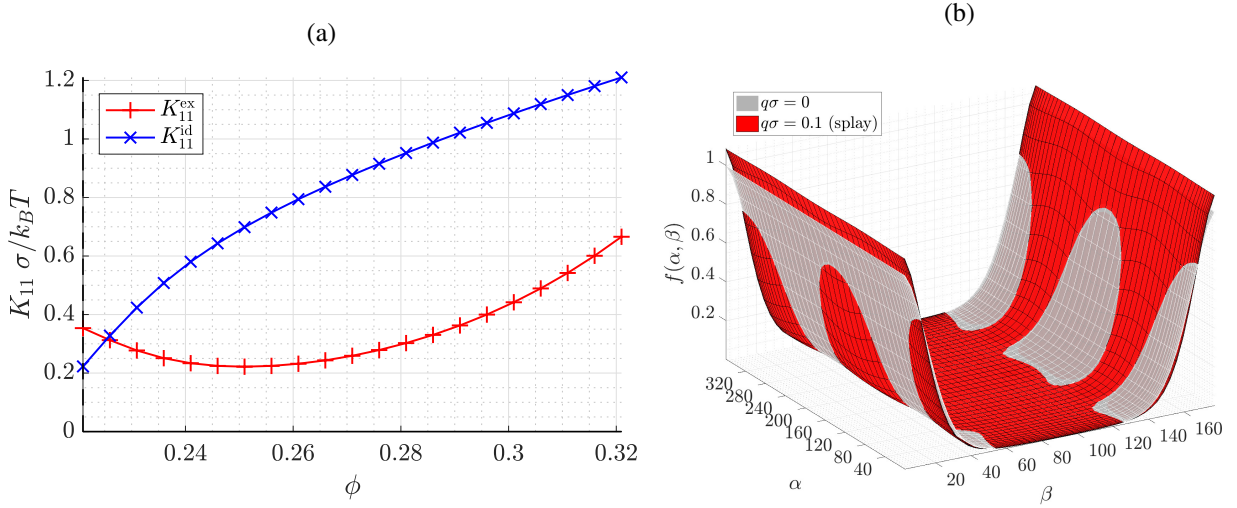

Figure S 3: (a) Contributions to the splay elastic constant,  $K_{11}^{\text{id}}$  and  $K_{11}^{\text{ex}}$ , for straight rods, as functions of the packing fraction  $\phi$ . (b) ODF of rods in the uniform nematic phase (gray) and in the presence of a splay deformation (red), as defined in Eqs. (11-12) of the main text. Calculations with orienting strength parameter  $a = 0.7$  and deformation wavenumber  $q\sigma = 0.1$ .

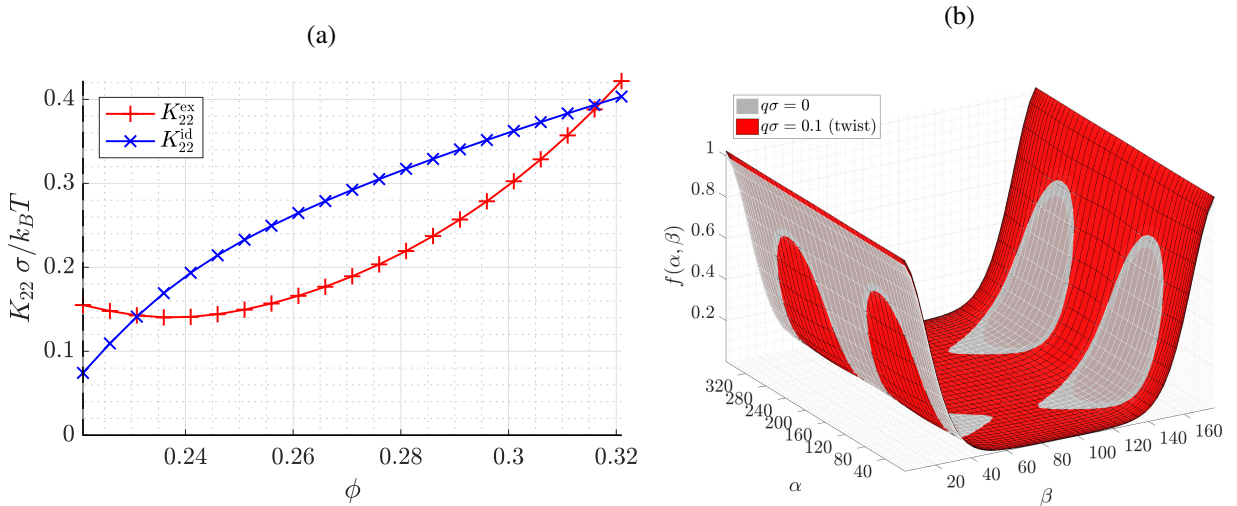

Figure S 4: (a) Contributions to the twist elastic constant,  $K_{22}^{\text{id}}$  and  $K_{22}^{\text{ex}}$ , for straight rods, as functions of the packing fraction  $\phi$ . (b) ODF of rods in the uniform nematic phase (gray) and in the presence of a twist deformation (red), as defined in Eqs. (11-12) of the main text. Calculations with orienting strength parameter  $a = 0.7$  and deformation wavenumber  $q\sigma = 0.1$ .

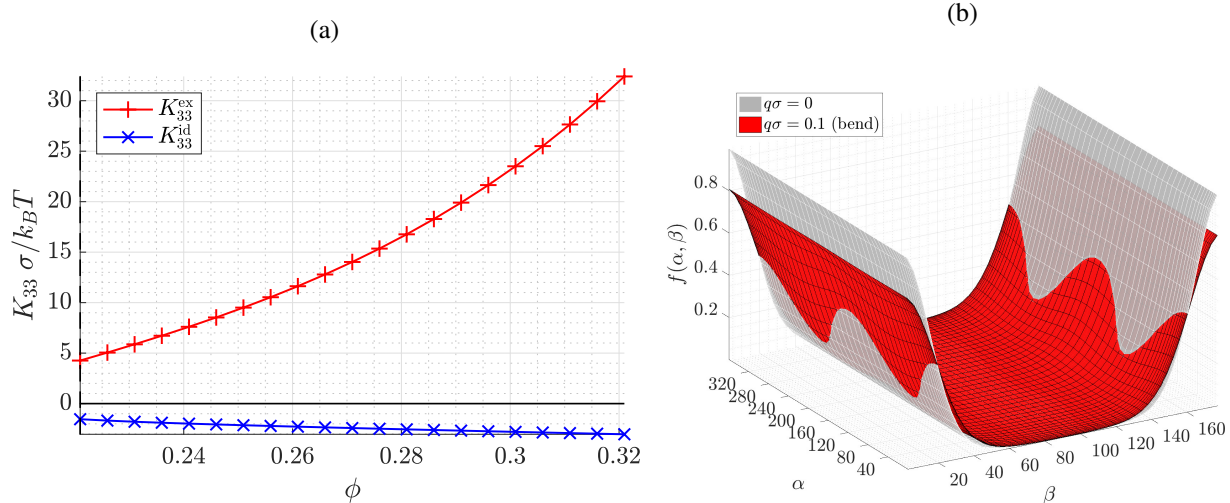

Figure S 5: (a) Contributions to the bend elastic constant,  $K_{33}^{\text{id}}$  and  $K_{33}^{\text{ex}}$ , for straight rods, as functions of the packing fraction  $\phi$ . (b) ODF of rods in the uniform nematic phase (gray) and in the presence of a bend deformation (red), as defined in Eqs. (11-12) of the main text. Calculations with orienting strength parameter  $a = 0.7$  and deformation wavenumber  $q\sigma = 0.1$ .

## 2.2 Bent Rod

(a) ODF plot ( $\alpha = 0^\circ$ ) for bent rods.

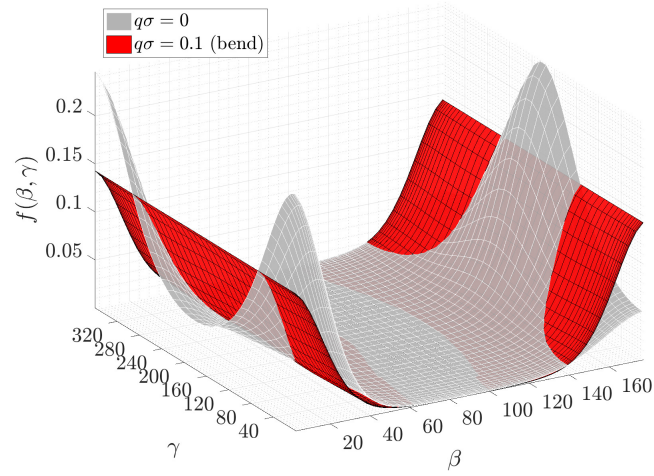

(b)

(c)

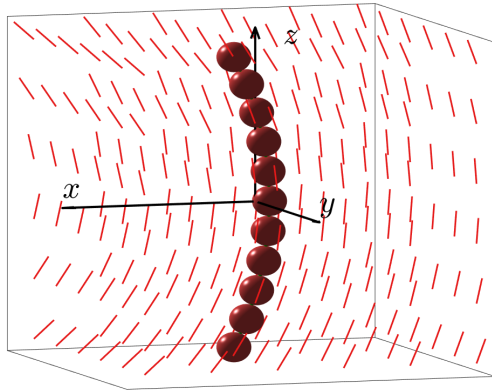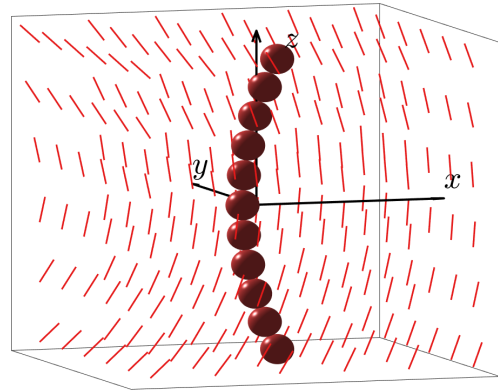

Figure S 6: (a) ODF of bent rods in the uniform nematic phase (gray) and in the presence of a bend deformation (red), as defined in Eqs. (11-12) of the main text. Calculations with orienting strength parameter  $a = 0.7$ , deformation wavenumber  $q\sigma = 0.1$  and  $\alpha = 0^\circ$ . The angles  $\beta$  and  $\gamma$  describe rotations around the molecular axes  $y$  and  $z$ , respectively. (b) Sketch of a bent rod immersed in a bent director field (red segments), in the orientation defined by the Euler angles  $\alpha = 0^\circ, \beta = 0^\circ, \gamma = 0^\circ$  (particle and distortion concavity in accordance), and (c)  $\alpha = 0^\circ, \beta = 0^\circ, \gamma = 180^\circ$  (particle and distortion concavity in opposition).

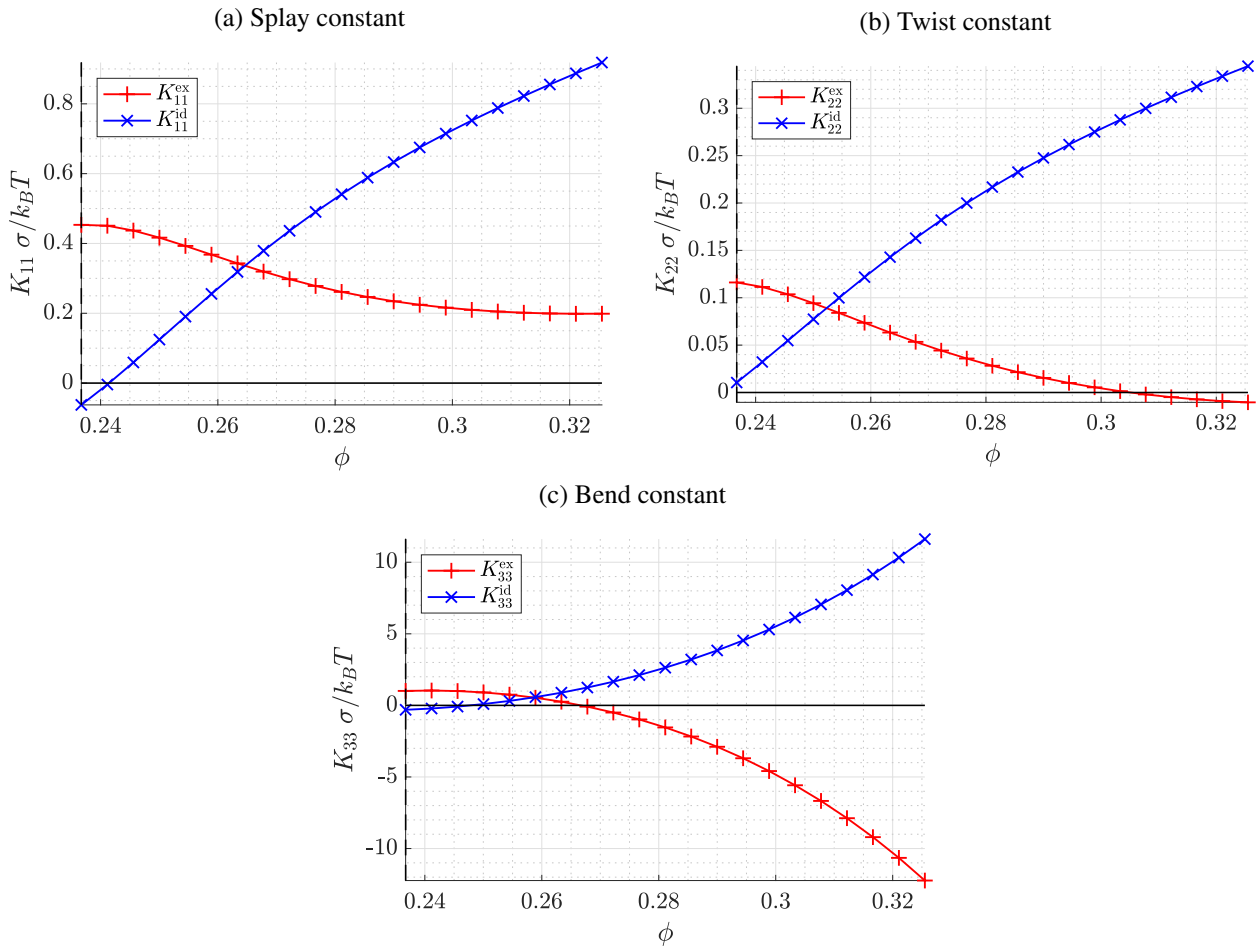

Figure S 7: Ideal and excess contributions to elastic constants for bent rod particles, as functions of the packing fraction  $\phi$ .
